# Supplementary material
Source: PubMed Central journal article supplement (PMC8257971)
Supplement: mmc2.pdf [file mmc2.pdf]

## Supplementary Appendix

### SUPPLEMENTARY FIGURES

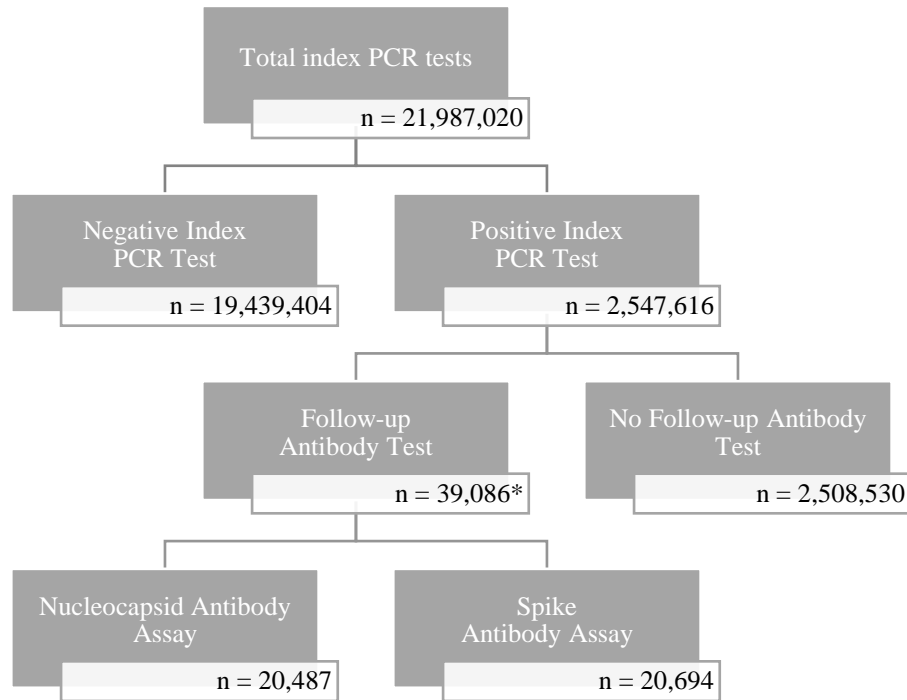

**Figure S1. Flowchart of Test Orders and Sample Sizes of Patients with Labcorp®.**

The flowchart represents the manner of test ordering used in the analysis, with an index PCR test for SARS-CoV-2 between March 1, 2020 and January 31, 2021, with sample sizes reflecting counts of unique patients only. 11.6% of patients tested positive for COVID-19 at index, but only a small fraction received a follow-up antibody test at some point after. \*Some patients with multiple follow-up antibody tests received an assay for both Nucleocapsid and Spike proteins, and therefore counts in the last tier overlap.

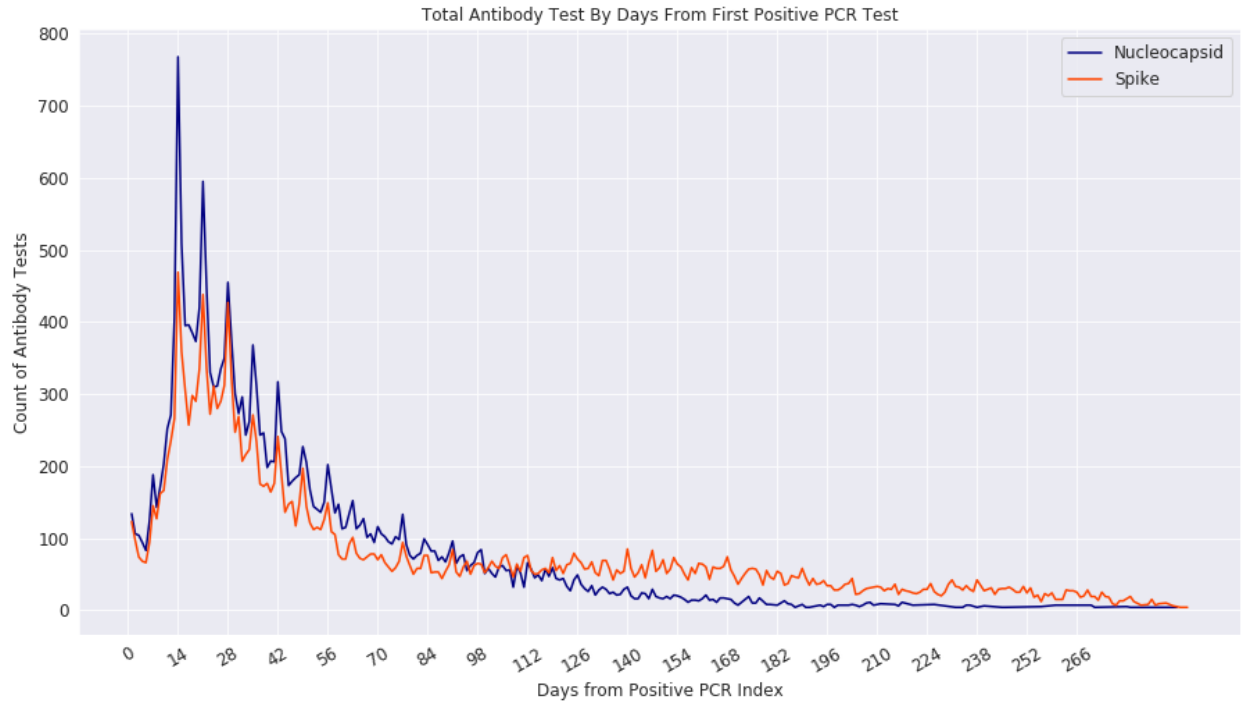

**Figure S2. Counts of total Nucleocapsid and Spike protein-based IgG assays after PCR at Labcorp®.** Counts for total assays done per protein type, Nucleocapsid (blue) and S (orange) proteins, days after initial PCR test for COVID-19. Both peak at 14 post initial PCR test and there is a higher volume of nucleocapsid tests, but spike becomes more common after about 100 days (only registering about 10% of peak volume).

SUPPLEMENTARY TABLES

**Table S1. Count of Nucleocapsid and Spike Antibody Tests by Weeks After First Positive PCR Test**

| <b>Weeks Post-Index</b> | <b>Days Post-Index</b> | <b>All</b> | <b>Nucleocapsid</b> | <b>Spike</b> |
|-------------------------|------------------------|------------|---------------------|--------------|
| 0                       | 1 - 7                  | 1146       | 642                 | 520          |
| 1                       | 8 - 14                 | 2897       | 1620                | 1300         |
| 2                       | 15 - 21                | 5473       | 3227                | 2293         |
| 3                       | 22 - 28                | 4848       | 2657                | 2224         |
| 4                       | 29 - 35                | 4065       | 2190                | 1903         |
| 5                       | 36 - 42                | 3113       | 1773                | 1360         |
| 6                       | 43 - 49                | 2629       | 1526                | 1116         |
| 7                       | 50 - 56                | 2070       | 1163                | 921          |
| 8                       | 57 - 63                | 1666       | 1002                | 671          |
| 9                       | 64 - 70                | 1337       | 805                 | 546          |
| 10                      | 71 - 77                | 1150       | 705                 | 453          |
| 11                      | 78 - 84                | 1090       | 623                 | 471          |
| 12                      | 85 - 91                | 928        | 540                 | 394          |
| 13                      | 92 - 98                | 904        | 490                 | 423          |
| 14                      | 99 - 105               | 850        | 428                 | 427          |
| 15                      | 106 - 112              | 790        | 347                 | 449          |
| 16                      | 113 - 119              | 746        | 357                 | 394          |
| 17                      | 120 - 126              | 729        | 288                 | 445          |
| 18                      | 127 - 133              | 637        | 221                 | 418          |
| 19                      | 134 - 140              | 575        | 181                 | 397          |
| 20                      | 141 - 147              | 556        | 146                 | 415          |
| 21                      | 148 - 154              | 576        | 134                 | 444          |
| 22                      | 155 - 161              | 493        | 105                 | 391          |
| 23                      | 162 - 168              | 506        | 109                 | 402          |
| 24                      | 169 - 175              | 450        | 87                  | 365          |
| 25                      | 176 - 182              | 401        | 61                  | 343          |
| 26                      | 183 - 189              | 371        | 62                  | 314          |
| 27                      | 190 - 196              | 333        | 38                  | 295          |
| 28                      | 197 - 203              | 265        | 39                  | 227          |
| 29                      | 204 - 210              | 262        | 54                  | 209          |
| 30                      | 211 - 217              | 246        | 37                  | 209          |
| 31                      | 218 - 224              | 209        | 33                  | 181          |
| 32                      | 225 - 231              | 217        | 25                  | 194          |
| 33                      | 232 - 238              | 246        | 25                  | 222          |
| 34                      | 239 - 245              | 226        | 29                  | 201          |
| 35                      | 246 - 252              | 224        | 22                  | 203          |
| 36                      | 253 - 259              | 170        | 23                  | 147          |
| 37                      | 260 - 266              | 195        | 33                  | 164          |
| 38                      | 267 - 273              | 164        | 23                  | 141          |

|    |           |     |    |     |
|----|-----------|-----|----|-----|
| 39 | 274 - 280 | 116 | 14 | 103 |
| 40 | 281 - 287 | 93  | 20 | 74  |
| 41 | 288 - 294 | 67  | 9  | 59  |
| 42 | 295 - 301 | 28  | 12 | 16  |

**Table S2. Count of Specific Assay Tests by Weeks After First Positive PCR Test**

| <b>Weeks Post-Index</b> | <b>Days Post-Index</b> | <b>Assay A</b> | <b>Assay B</b> | <b>Assay C</b> | <b>Assay D</b> |
|-------------------------|------------------------|----------------|----------------|----------------|----------------|
| 0                       | 1 - 7                  | 73             | 449            | 557            | 88             |
| 1                       | 8 - 14                 | 169            | 1141           | 1371           | 262            |
| 2                       | 15 - 21                | 337            | 1977           | 2814           | 432            |
| 3                       | 22 - 28                | 296            | 1942           | 2244           | 436            |
| 4                       | 29 - 35                | 242            | 1670           | 1884           | 321            |
| 5                       | 36 - 42                | 228            | 1140           | 1527           | 252            |
| 6                       | 43 - 49                | 194            | 934            | 1315           | 212            |
| 7                       | 50 - 56                | 158            | 768            | 988            | 181            |
| 8                       | 57 - 63                | 142            | 532            | 852            | 163            |
| 9                       | 64 - 70                | 179            | 373            | 685            | 126            |
| 10                      | 71 - 77                | 156            | 298            | 600            | 111            |
| 11                      | 78 - 84                | 207            | 266            | 527            | 98             |
| 12                      | 85 - 91                | 155            | 240            | 450            | 95             |
| 13                      | 92 - 98                | 166            | 258            | 392            | 103            |
| 14                      | 99 - 105               | 170            | 257            | 347            | 83             |
| 15                      | 106 - 112              | 136            | 313            | 271            | 79             |
| 16                      | 113 - 119              | 112            | 286            | 283            | 79             |
| 17                      | 120 - 126              | 122            | 326            | 235            | 56             |
| 18                      | 127 - 133              | 100            | 319            | 175            | 49             |
| 19                      | 134 - 140              | 72             | 326            | 125            | 56             |
| 20                      | 141 - 147              | 80             | 335            | 107            | 40             |
| 21                      | 148 - 154              | 72             | 375            | 83             | 54             |
| 22                      | 155 - 161              | 53             | 338            | 69             | 36             |
| 23                      | 162 - 168              | 39             | 365            | 58             | 53             |
| 24                      | 169 - 175              | 41             | 324            | 38             | 49             |
| 25                      | 176 - 182              | 46             | 297            | 24             | 37             |
| 26                      | 183 - 189              | 47             | 269            | 22             | 42             |
| 27                      | 190 - 196              | 51             | 245            | 10             | 28             |
| 28                      | 197 - 203              | 39             | 189            | 18             | 21             |
| 29                      | 204 - 210              | 39             | 170            | 22             | 33             |
| 30                      | 211 - 217              | 38             | 171            | 13             | 24             |
| 31                      | 218 - 224              | 22             | 161            | 14             | 19             |
| 32                      | 225 - 231              | 28             | 167            | 8              | 17             |
| 33                      | 232 - 238              | 20             | 204            | 11             | 14             |
| 34                      | 239 - 245              | 21             | 181            | 6              | 23             |
| 35                      | 246 - 252              | 15             | 189            | 3              | 19             |
| 36                      | 253 - 259              | 6              | 143            | 4              | 20             |
| 37                      | 260 - 266              | 1              | 167            | 1              | 32             |
| 38                      | 267 - 273              | 0              | 142            | 5              | 18             |
| 39                      | 274 - 280              | 0              | 104            | 1              | 13             |
| 40                      | 281 - 287              | 0              | 74             | 3              | 18             |

|    |           |  |   |    |   |    |
|----|-----------|--|---|----|---|----|
| 41 | 288 - 294 |  | 0 | 61 | 3 | 6  |
| 42 | 295 - 301 |  | 0 | 17 | 3 | 10 |
